# Supplementary material for: 2023/24 mid-season influenza and Omicron XBB.1.5 vaccine effectiveness estimates from the Canadian Sentinel Practitioner Surveillance Network (SPSN)
Source: PubMed Central journal article supplement (PMC10986657; doi:10.2807/1560-7917.es.2024.29.7.2400076), 2024-02-15
Supplement: 24-00076_SKOWRONSKI_Supplement.pdf [file 24-00076_SKOWRONSKI_Supplement.pdf]

## Supplementary Materials

This supplementary material is hosted by *Eurosurveillance* as supporting information alongside the article “*2023/24 midseason influenza and Omicron XBB.1.5 vaccine effectiveness estimates from the Canadian Sentinel Practitioner Surveillance Network (SPSN)*” on behalf of the authors who remain responsible for the accuracy and appropriateness of the content. The same standards for ethics, copyright, attributions and permissions as for the article apply. Supplements are not edited by *Eurosurveillance* and the journal is not responsible for the maintenance of any links or email addresses provided therein.

## Table of Contents (Hyperlinked)

|                                                                                                                                                                                                                                                                                                                |    |
|----------------------------------------------------------------------------------------------------------------------------------------------------------------------------------------------------------------------------------------------------------------------------------------------------------------|----|
| <b>Supplementary Table S1.</b> Details related to hemagglutinin (HA) sequences of original, cell-passaged, egg-passaged and high growth reassortant (HGR) versions of the 2023/24 inactivated (A/Victoria/4897/2022) and live attenuated (A/Norway/31694/2022) influenza vaccine strains of A(H1N1)pdm09 ..... | 3  |
| <b>Supplementary Table S2.</b> Influenza A case viruses (n=382) by genetic subgroup in vaccine effectiveness analyses, Canadian Sentinel Practitioner Surveillance Network (SPSN), 29 October (week 44) 2023 – 13 January (week 2) 2024 .....                                                                  | 4  |
| <b>Supplementary Table S3.</b> SARS-CoV-2 case viruses (n=236) by genomic lineage in vaccine effectiveness analyses, Canadian Sentinel Practitioner Surveillance Network (SPSN), 29 October (week 44) 2023 – 13 January (week 2) 2024 .....                                                                    | 5  |
| <b>Supplementary Figure S1.</b> Distribution of influenza A(H1N1)pdm09 clade 5a.2a.1 (n=195) and clade 5a.2a (n=187) case viruses by age group, Canadian Sentinel Practitioner Surveillance Network (SPSN), 29 October (week 44) 2023 – 13 January (week 2) 2024 .....                                         | 6  |
| <b>Supplementary Table S4.</b> Examination of potential bias due to correlated influenza and XBB.1.5 vaccine receipt .....                                                                                                                                                                                     | 7  |
| <b>Supplementary Table S5.</b> Sensitivity influenza vaccine effectiveness estimates against influenza A overall, by subtype and A(H1N1)pdm09 clade, Canadian Sentinel Practitioner Surveillance Network (SPSN), 29 October (week 44) 2023 – 13 January (week 2) 2024 .....                                    | 8  |
| <b>Supplementary Table S6.</b> Sensitivity XBB.1.5 vaccine effectiveness estimates against COVID-19 among participants ≥ 12 years in BC, Ontario and Quebec, Canadian Sentinel Practitioner Surveillance Network (SPSN), 29 October (week 44) 2023 – 13 January (week 2) 2024 .....                            | 10 |
| <b>Supplementary Table S7.</b> Age-stratified XBB.1.5 vaccine effectiveness estimates against COVID-19 among participants 12-64 years and ≥ 65 years in BC, Ontario and Quebec, Canadian Sentinel Practitioner Surveillance Network (SPSN), 29 October (week 44) 2023 – 13 January (week 2) 2024 .....         | 12 |
| <b>References, Supplementary Material</b> .....                                                                                                                                                                                                                                                                | 13 |

**Supplementary Table S1.** Details related to hemagglutinin (HA) sequences of original, cell-passaged, egg-passaged and high growth reassortant (HGR) versions of the 2023/24 inactivated (A/Victoria/4897/2022) and live attenuated (A/Norway/31694/2022) influenza vaccine strains of A(H1N1)pdm09

Sequences were downloaded from the Global Initiative on Sharing All Influenza Data (GISAID) with details displayed below [\[1\]](#).

| Segment ID | Country   | Collection date | Isolate-ID       | Isolate name                             | Originating Lab                                                  | Submitting Lab                                                   | Authors                                                      |
|------------|-----------|-----------------|------------------|------------------------------------------|------------------------------------------------------------------|------------------------------------------------------------------|--------------------------------------------------------------|
| EPI2320530 | Australia | 2022-Oct-02     | EPI_ISL_16733796 | A/Victoria/4897/2022                     | Royal Melbourne Hospital                                         | WHO Collaborating Centre for Reference and Research on Influenza | Soppe, S; Rynehart, C; Peck, H; Aziz, A                      |
| EPI2235969 | Australia | 2022-Oct-02     | EPI_ISL_16003490 | A/Victoria/4897/2022                     |                                                                  |                                                                  |                                                              |
| EPI2319193 | Australia | 2022-Oct-02     | EPI_ISL_16714268 | A/Victoria/4897/2022                     |                                                                  |                                                                  |                                                              |
| EPI2397519 | Australia | 2022-Oct-02     | EPI_ISL_16899235 | A/Victoria/4897/2022                     |                                                                  |                                                                  |                                                              |
| EPI2439437 | Australia | 2023-Jan-01     | EPI_ISL_17086692 | IVR-238 (A/Victoria/4897/2022)           | Seqirus Pty Ltd (CSL Group)                                      |                                                                  | Deng, Y-M; Barr, I; Aziz, A                                  |
| EPI2437457 | Australia | 2022-Oct-02     | EPI_ISL_17072386 | A/Victoria/4897/2022 (22/316)            | WHO Collaborating Centre for Reference and Research on Influenza | National Institute for Biological Standards and Control (NIBSC)  | Nicolson, Carolyn                                            |
| EPI2437459 | Australia | 2022-Oct-02     | EPI_ISL_17072387 | A/Victoria/4897/2022 IVR-238 (22/318)    | Seqirus Pty Ltd (CSL Group)                                      |                                                                  |                                                              |
| EPI2805564 | Australia | 2022-Oct-02     | EPI_ISL_18557516 | A/Victoria/4897/2022 IVR-238 (23/250)    | Victoria Infectious Diseases Reference Laboratory                |                                                                  |                                                              |
| EPI2805566 | Australia | 2022-Oct-02     | EPI_ISL_18557517 | A/Victoria/4897/2022 (23/252)            |                                                                  |                                                                  |                                                              |
| EPI2461771 | Australia | 2022-Oct-02     | EPI_ISL_17206439 | IVR-238 A/Victoria/4897/2022 (20230302A) | Seqirus Pty Ltd (CSL Group)                                      | WHO Chinese National Influenza Center                            |                                                              |
| EPI2603720 | Australia | 2022-Oct-02     | EPI_ISL_17830834 | A/Victoria/4897/2022                     | WHO Collaborating Centre for Reference and Research on Influenza | Centers for Disease Control and Prevention                       |                                                              |
| EPI2447516 | Australia | 2022-Oct-02     | EPI_ISL_17102775 | A/Victoria/4897/2022                     |                                                                  |                                                                  |                                                              |
| EPI2213676 | Norway    | 2022-Sep-24     | EPI_ISL_15728546 | A/Norway/31694/2022                      | Norwegian Institute of Public Health                             | Norwegian Institute of Public Health                             | Bragstad, K; Hungnes, O; Madsen, M, P; Rohringer, A; Riis, R |
| EPI2603712 | Norway    | 2022-Sep-24     | EPI_ISL_17830833 | A/Norway/31694/2022                      | National Institute for Medical Research                          | Centers for Disease Control and Prevention                       |                                                              |
| EPI2238868 | Norway    | 2022-Sep-24     | EPI_ISL_16043978 | A/Norway/31694/2022                      | WHO National Influenza Centre                                    | Crick Worldwide Influenza Centre                                 |                                                              |
| EPI2495553 | Norway    | 2022-Sep-24     | EPI_ISL_17352907 | A/Norway/31694/2022 (22/312)             | Crick Worldwide Influenza Centre                                 | National Institute for Biological Standards and Control (NIBSC)  | Nicolson, Carolyn                                            |
| EPI2495559 | Norway    | 2022-Sep-24     | EPI_ISL_17352969 | A/Norway/31694/2022 NIB-133 (23/112)     |                                                                  |                                                                  |                                                              |

**Supplementary Table S2.** Influenza A case viruses (n=382) by genetic subgroup in vaccine effectiveness analyses, Canadian Sentinel Practitioner Surveillance Network (SPSN), 29 October (week 44) 2023 – 13 January (week 2) 2024

| Genetic clade, as defined by ECDC [2] based upon specified amino acid substitutions <sup>1,2</sup><br>+ additional substitutions identified (antigenic site) | NextStrain<br>subclade [3] | BC<br>n (%)     | Alberta<br>n (%) | Ontario<br>n (%) | Québec<br>n (%) | TOTAL<br>n (%)   |
|--------------------------------------------------------------------------------------------------------------------------------------------------------------|----------------------------|-----------------|------------------|------------------|-----------------|------------------|
| <b>Influenza A(H1N1)pdm09</b> , N (case viruses)                                                                                                             |                            | <b>68</b>       | <b>105</b>       | <b>244</b>       | <b>137</b>      | <b>554</b>       |
| Case viruses sequenced, n (% n/N)                                                                                                                            |                            | <b>61 (90%)</b> | <b>81 (77%)</b>  | <b>143 (59%)</b> | <b>97 (71%)</b> | <b>382 (69%)</b> |
| <b>5a.2a = 5a.2 + K54Q + A186T (Sb) + Q189E (Sb) + E224A (RBS) + R259K + K308R</b>                                                                           |                            | <b>22 (36%)</b> | <b>40 (49%)</b>  | <b>71 (50%)</b>  | <b>54 (56%)</b> | <b>187 (49%)</b> |
| + HA2: I91V <sup>3</sup>                                                                                                                                     | C.1                        | 2               | 6                | 19               | 19              | 43               |
| + T120A + K169Q (Ca1) + HA2: I91V                                                                                                                            |                            | 2               | 7                | 24               | 29              | 62               |
| + T120A + V47I + I96T + HA2: I91V                                                                                                                            |                            | 17              | 27               | 24               | 5               | 76               |
| + T216A + D94N + HA2: I206V                                                                                                                                  | C.1.7                      | 1               |                  | 4                | 1               | 6                |
| <b>5a.2a.1 = 5a.2a + P137S (Ca2) + K142R (Ca2) + D260E + T277A + HA2: E29D + I91V + N124H</b>                                                                | C.1.1                      | <b>39 (64%)</b> | <b>41 (51%)</b>  | <b>72 (50%)</b>  | <b>43 (44%)</b> | <b>195 (51%)</b> |
| + T216A <sup>4,5</sup>                                                                                                                                       | C.1.1.1                    | 9               | 4                | 24               | 14              | 51               |
| + T216A <sup>5</sup> + R45K                                                                                                                                  |                            | 30              | 37               | 48               | 29              | 144              |
| <b>Influenza A(H3N2)</b> , N (case viruses)                                                                                                                  |                            | <b>12</b>       | <b>5</b>         | <b>122</b>       | <b>3</b>        | <b>142</b>       |
| Case viruses sequenced, n (% n/N)                                                                                                                            |                            | <b>9 (75%)</b>  | <b>4 (80%)</b>   | <b>76 (63%)</b>  | <b>2 (67%)</b>  | <b>91 (64%)</b>  |
| <b>2a.1b = 2a + D53G (C) + D104G + K276R (C) + I140K (A) + R299K (C)</b>                                                                                     | G.1.1.2                    |                 |                  | <b>2 (3%)</b>    |                 | <b>2 (%)</b>     |
| <b>2a.3a = 2a + D53N (C) + N96S (D)(+CHO) + I192F (B) + E50K (C) + HA2: N49S</b>                                                                             | G.1.3.1                    |                 |                  | <b>1 (1%)</b>    |                 | <b>1 (%)</b>     |
| <b>2a.3a.1 = 2a.3a + I140K (A) + I223V</b>                                                                                                                   | H                          | <b>9 (100%)</b> | <b>4 (100%)</b>  | <b>73 (96%)</b>  | <b>2 (100%)</b> | <b>88 (97%)</b>  |
| + I25V + HA2: V18M + I89V                                                                                                                                    | H.1                        | 1               | 1                | 3                |                 | 5                |
| + N122D (A)(-CHO) + K276E (C) <sup>6</sup>                                                                                                                   | H.2                        | 7               | 2                | 67               | 1               | 77               |
| + K276E (C) + Q173R (D)                                                                                                                                      | H.4                        |                 | 1                |                  | 1               | 2                |

BC = British Columbia; ECDC = European Centre for Disease Control and Prevention; -CHO = loss of potential glycosylation site; RBS = receptor binding site. A(H1N1)pdm09 clade colour coding aligns with **Figure 1 (panel C)** of the main manuscript.

<sup>1</sup> Influenza A(H1N1)pdm09 substitutions relative to A/Wisconsin/588/2019 5a.2 reference virus and Influenza A(H3N2) substitutions relative to A/Darwin/6/2021 2a reference virus.

<sup>2</sup> WGS performed using Oxford Nanopore technology with inclusion criteria of  $\geq 50X$  depth of coverage across  $\geq 90\%$  of the HA segment; Sanger sequencing used to supplement insufficient HA sequence data.

<sup>3</sup> Includes 13 viruses with additional substitutions D269N, P137S (Ca2)

<sup>4</sup> Includes 24 viruses with additional substitutions R113K, HA2: V100I.

<sup>5</sup> Potential glycosylation impacts; see discussion for explanation.

<sup>6</sup> Includes 20 viruses with reversion E276K (C)

**Supplementary Table S3.** SARS-CoV-2 case viruses (n=236) by genomic lineage in vaccine effectiveness analyses, Canadian Sentinel Practitioner Surveillance Network (SPSN), 29 October (week 44) 2023 – 13 January (week 2) 2024

Whole genome sequencing of SPSN SARS-CoV-2 case viruses followed routine provincial or national laboratory protocols [4-12], and contemporary Pango nomenclature [13,14]. See [Supplementary Material references](#) for details.

| Genetic lineage, as defined by Pango nomenclature |                                                      | British Columbia | Ontario          | Québec          | TOTAL            |
|---------------------------------------------------|------------------------------------------------------|------------------|------------------|-----------------|------------------|
| Parental lineage <sup>1</sup>                     | Sub-lineages detected in SPSN samples <sup>2,3</sup> |                  |                  |                 |                  |
| <b>Case viruses, N</b>                            |                                                      | <b>20</b>        | <b>199</b>       | <b>114</b>      | <b>333</b>       |
| Case viruses sequenced, n (% n/N)                 |                                                      | <b>14 (70%)</b>  | <b>125 (63%)</b> | <b>97 (85%)</b> | <b>236 (71%)</b> |
| XBB                                               | XCH.*, FY.5, XCP, GW.5, GS.4.1                       |                  | 6                | 3               | 9                |
| XBB.1.5                                           | JD.1.*, GK.1.*, HR.1, HY.1                           |                  | 12               | 3               | 15               |
| XBB.1.16                                          | JF.1                                                 | 3                | 2                | 4               | 9                |
| XBB.1.9                                           | FL.1.5.*                                             |                  | 2                | 2               | 4                |
| EG.5.1                                            | JG.3, HK.*                                           | 1                | 22               | 12              | 35               |
| HV.1                                              |                                                      | 3                | 34               | 26              | 63               |
| BA.2.75                                           | DV.7.1.*                                             |                  | 1                | 2               | 3                |
| BA.2.86                                           | JN.*                                                 |                  | 6                | 2               | 8                |
| JN.1                                              |                                                      | 7                | 40               | 43              | 90               |

Clade colour coding aligns with **Figure 1 (panel D)** of the main manuscript.

<sup>1</sup> All lineages include their descendants unless otherwise listed.

<sup>2</sup> Only lineages with unique Pango designations noted here.

<sup>3</sup> Asterisks indicates the lineage includes any descendants, except ones displayed separately.

**Supplementary Figure S1.** Distribution of influenza A(H1N1)pdm09 clade 5a.2a.1 (n=195) and clade 5a.2a (n=187) case viruses by age group, Canadian Sentinel Practitioner Surveillance Network (SPSN), 29 October (week 44) 2023 – 13 January (week 2) 2024

The percentage of sequenced A(H1N1)pdm09 viruses that were clade 5a.2a.1 versus clade 5a.2a sequenced by age group are displayed below, with the tally (n) of clade-specific viruses overlaid.

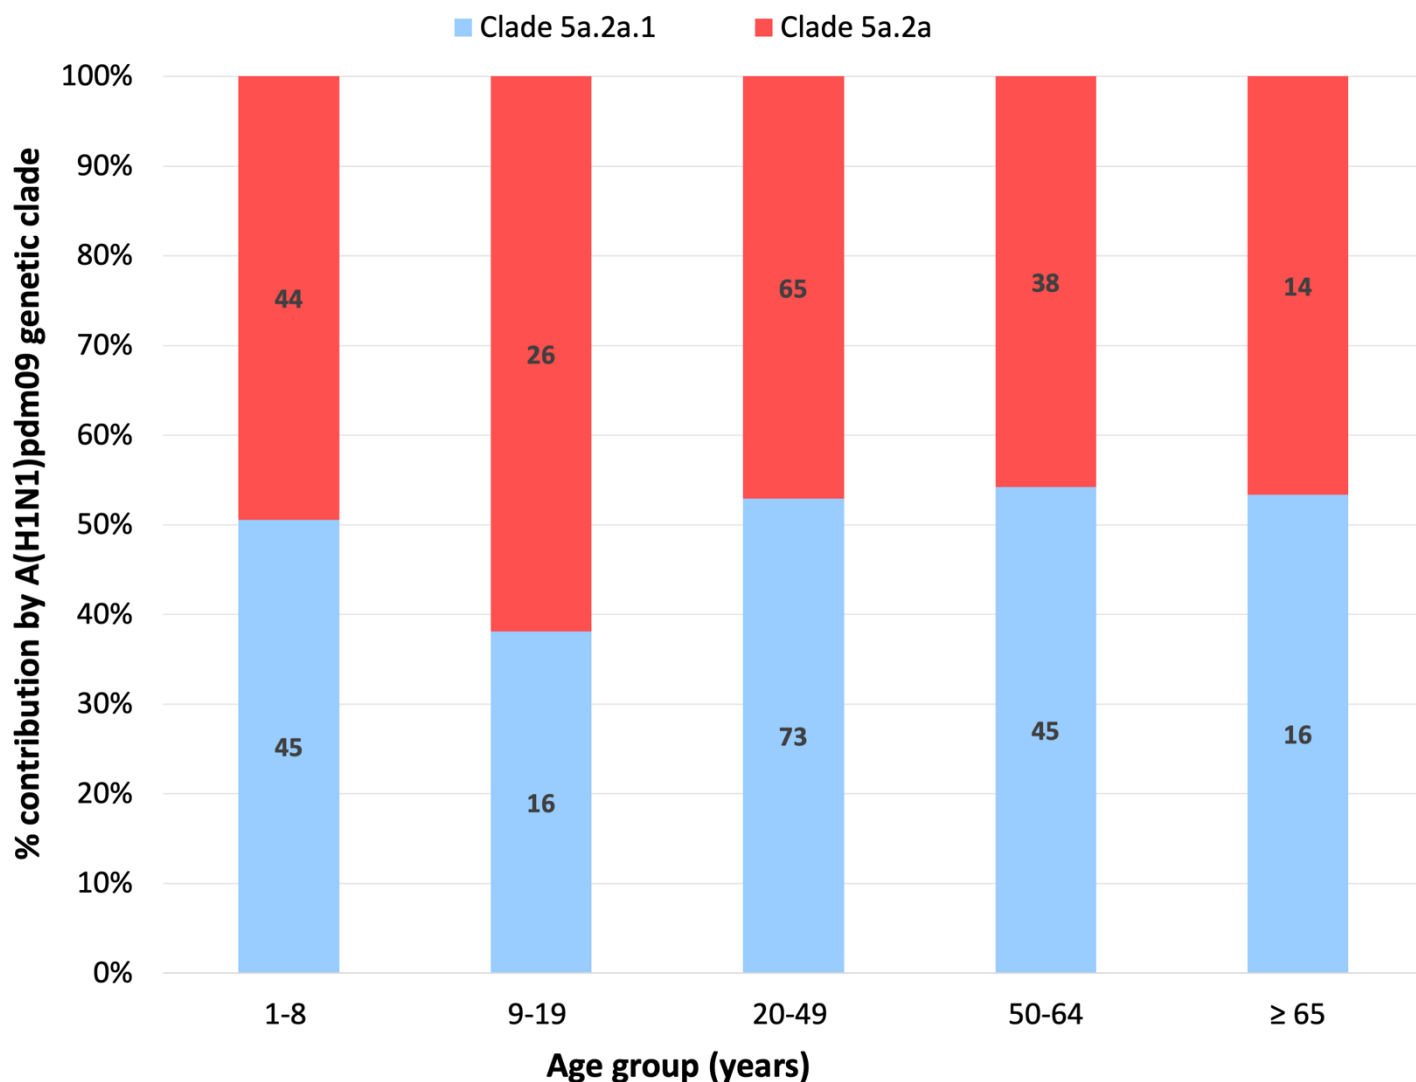

## Supplementary Table S4. Examination of potential bias due to correlated influenza and XBB.1.5 vaccine receipt

A core principle for valid vaccine effectiveness (VE) estimation by the test-negative case-control design (TND) is that the evaluated vaccine must have no effect upon other aetiologies (e.g., viruses) causing the same disease (e.g., acute respiratory illness) included in the test-negative control series [15]. For vaccines, this principle is generally respected owing to the highly specific nature of vaccine-induced protection toward the target pathogen of interest, with no effect on non-target pathogens and as validated for influenza vaccine in TND analysis of randomized controlled datasets [15].

However, Doll et al have raised a potential bias due to correlated receipt of other vaccines [16]. Such bias does not require a direct causal or biological association between the vaccine of interest and non-target pathogens included in the control series and does not represent a violation of the core TND principle. Rather it reflects the influence of correlated vaccines received and *their* impacts on other aetiologies within the control series (i.e., an indirect confounding pathway). Within our mid-season SPSN dataset, we explored this potential bias through crude examination of participant profiles (restricted to provinces of British Columbia (BC), Ontario and Quebec providing XBB.1.5 vaccine information), as shown unadjusted in the table below, and in VE sensitivity analyses with covariate adjustment, as shown in [Supplementary Tables S5 and S6](#).

As expected for protective virus-specific vaccines, across the analysis period, the percentage considered influenza vaccinated within our dataset was lower among influenza A cases than controls (84/564; 15% versus 600/2006; 30% ( $p < 0.001$ ). Similarly, the percentage considered XBB.1.5 vaccinated was lower among COVID-19 cases than controls (39/317; 11% versus 319/1767; 18%) ( $p = 0.01$ ).

Also consistent with virus-specific vaccines, among participants considered not vaccinated against influenza, the percentage who were vaccinated with XBB.1.5 vaccine did not differ among influenza A cases versus controls (16/480; 3% versus 39/1406; 3%) ( $p = 0.53$ ). Similarly, among participants who were not vaccinated with XBB.1.5 vaccine, the percentage who were vaccinated with influenza vaccine did not differ between COVID-19 cases versus controls (52/278; 19% versus 264/1448; 18%) ( $p = 0.85$ ).

Among participants considered influenza vaccinated, a comparable proportion of influenza A cases and controls had also received the XBB.1.5 vaccine (45/84; 54% versus 328/600; 55%) ( $p = 0.85$ ). Conversely, among participants considered XBB.1.5 vaccinated, all (39/39) COVID-19 cases versus 281/319 (88%) controls reported influenza vaccination (Fisher exact  $p = 0.02$ ).

| Influenza A analyses<br>(Restricted to BC, Ontario and Quebec and $\geq 1$ year)             | Influenza A Cases                 |                          |       | Influenza Test-negative Controls  |                          |       | Total |
|----------------------------------------------------------------------------------------------|-----------------------------------|--------------------------|-------|-----------------------------------|--------------------------|-------|-------|
|                                                                                              | Influenza vaccinated <sup>1</sup> | Not influenza vaccinated | Total | Influenza vaccinated <sup>1</sup> | Not influenza vaccinated | Total |       |
| XBB.1.5 vaccinated <sup>2</sup>                                                              | 45 (54%) <sup>3</sup>             | 16 (3%) <sup>4</sup>     | 61    | 328 (55%) <sup>3</sup>            | 39 (3%) <sup>4</sup>     | 367   | 428   |
| Not XBB.1.5 vaccinated                                                                       | 39                                | 464                      | 503   | 272                               | 1367                     | 1639  | 2142  |
| Total                                                                                        | 84 (15%) <sup>5</sup>             | 480                      | 564   | 600 (30%) <sup>5</sup>            | 1406                     | 2006  | 2570  |
| COVID-19 analyses <sup>6</sup><br>(Restricted to BC, Ontario and Quebec and $\geq 12$ years) | COVID-19 Cases                    |                          |       | SARS-CoV-2 Test-negative Controls |                          |       | Total |
|                                                                                              | XBB.1.5 Vaccinated <sup>1</sup>   | Not XBB.1.5 Vaccinated   | Total | XBB.1.5 Vaccinated <sup>1</sup>   | Not XBB.1.5 Vaccinated   | Total |       |
| Influenza vaccinated <sup>2</sup>                                                            | 39 (100%) <sup>7</sup>            | 52 (19%) <sup>8</sup>    | 91    | 281 (88%) <sup>7</sup>            | 264 (18%) <sup>8</sup>   | 545   | 636   |
| Not influenza vaccinated                                                                     | 0                                 | 226                      | 226   | 38                                | 1184                     | 1222  | 1448  |
| Total                                                                                        | 39 (11%) <sup>9</sup>             | 278                      | 317   | 319 (18%) <sup>9</sup>            | 1448                     | 1767  | 2084  |

Among controls included in COVID-19 analyses, nearly 90% who received XBB.1.5 vaccine also received influenza vaccine; whereas, among influenza controls, just slightly more than half who received influenza vaccine also received XBB.1.5 vaccine. Based upon the above, it appears that among those who came to receive XBB.1.5 vaccine, co-administration of influenza vaccine was more likely than the reverse scenario of XBB.1.5 vaccine co-administration among those coming for influenza vaccine.

In our dataset, the inclusion of influenza cases in the COVID-19 control series could lead to under-estimation of XBB.1.5 VE. This is because with protective influenza vaccine, influenza cases are less likely to be influenza vaccinated and given associated XBB.1.5 vaccine receipt, also less likely to be XBB.1.5 vaccinated. To assess this signal of possible bias in adjusted VE analyses, we removed influenza cases (both influenza A and B) from the COVID-19 control series and also explored removing COVID-19 cases from the influenza control series, as shown in [Supplementary Tables S5 and S6](#).

<sup>1</sup> Vaccinated  $\geq 2$  weeks prior to onset of acute respiratory illness. Participants vaccinated  $< 2$  weeks before onset or with unknown vaccination status/timing excluded.

<sup>2</sup> Any receipt of the specified vaccine without regard to timing in relation to illness onset (unknown vaccination status excluded).

<sup>3</sup> Among participants considered influenza vaccinated, comparison of percent XBB.1.5 vaccinated between influenza cases versus controls, chi-square  $p = 0.85$

<sup>4</sup> Among participants considered not influenza vaccinated, comparison of percent XBB.1.5 vaccinated between influenza cases versus controls, chi-square  $p = 0.53$

<sup>5</sup> Among influenza A cases versus controls, comparison of percent considered influenza vaccinated, chi-square  $p < 0.001$ .

<sup>6</sup> As per Table 2 of the main manuscript, no exclusions based upon date of the last non-XBB.1.5 vaccine dose are applied in this exploration.

<sup>7</sup> Among participants considered XBB.1.5 vaccinated, comparison of percent influenza vaccinated between COVID-19 cases versus controls, Fisher's exact  $p = 0.019$

<sup>8</sup> Among participants considered not XBB.1.5 vaccinated, comparison of percent influenza vaccinated between COVID-19 cases versus controls, chi-square  $p = 0.85$

<sup>9</sup> Among COVID-19 cases versus controls, comparison of percent considered XBB.1.5 vaccinated by chi-square,  $p = 0.01$ .

**Supplementary Table S5.** Sensitivity influenza vaccine effectiveness estimates against influenza A overall, by subtype and A(H1N1)pdm09 clade, Canadian Sentinel Practitioner Surveillance Network (SPSN), 29 October (week 44) 2023 – 13 January (week 2) 2024

|                                                                                 | Total | Cases                 |    | Controls              |    | Unadjusted VE <sup>a</sup> |          | Adjusted VE <sup>a,b</sup> |        |  |
|---------------------------------------------------------------------------------|-------|-----------------------|----|-----------------------|----|----------------------------|----------|----------------------------|--------|--|
|                                                                                 | N     | n vac <sup>c</sup> /N | %  | n vac <sup>c</sup> /N | %  | %                          | 95% CI   | %                          | 95% CI |  |
| <b>With additional sex and comorbidity adjustment<sup>d</sup></b>               |       |                       |    |                       |    |                            |          |                            |        |  |
| <b>Influenza A<sup>e</sup></b>                                                  | 2729  | 101/640               | 16 | 613/2089              | 29 | 55                         | 43–64    | 58                         | 46–68  |  |
| 1-19 years <sup>e</sup>                                                         | 757   | 21/197                | 11 | 99/560                | 18 | 44                         | 8–66     | 63                         | 35–79  |  |
| 20-64 years <sup>e</sup>                                                        | 1514  | 54/375                | 14 | 270/1139              | 24 | 46                         | 26–61    | 53                         | 35–67  |  |
| ≥ 65 years <sup>e,f</sup>                                                       | 458   | 26/68                 | 38 | 244/390               | 63 | 63                         | 37–78    | 68                         | 43–83  |  |
| ≥ 12 years, restricted to BC, Ontario, Quebec <sup>g</sup>                      | 1906  | 68/409                | 17 | 472/1497              | 32 | 57                         | 43–67    | 57                         | 42–69  |  |
| <b>Influenza A(H1N1)pdm09<sup>e</sup></b>                                       | 2579  | 71/490                | 14 | 613/2089              | 29 | 59                         | 47–69    | 62                         | 49–72  |  |
| 1-19 years <sup>e</sup>                                                         | 715   | 13/155                | 8  | 99/560                | 18 | 57                         | 22–77    | 70                         | 42–84  |  |
| 20-64 years <sup>e</sup>                                                        | 1424  | 40/285                | 14 | 270/1139              | 24 | 47                         | 25–63    | 56                         | 35–70  |  |
| ≥ 65 years <sup>e,f</sup>                                                       | 440   | 18/50                 | 36 | 244/390               | 63 | 66                         | 38–82    | 71                         | 44–85  |  |
| ≥ 12 years, restricted to BC, Ontario, Quebec <sup>g</sup>                      | 1796  | 46/299                | 15 | 472/1497              | 32 | 61                         | 45–72    | 62                         | 45–73  |  |
| 5a.2a.1 <sup>e</sup>                                                            | 2262  | 29/173                | 17 | 613/2089              | 29 | 52                         | 27–68    | 55                         | 30–71  |  |
| ≥ 12 years, restricted to BC, Ontario, Quebec <sup>g</sup>                      | 1597  | 19/100                | 19 | 472/1497              | 32 | 49                         | 15–69    | 49                         | 11–70  |  |
| 5a.2a <sup>e</sup>                                                              | 2256  | 21/167                | 13 | 613/2089              | 29 | 65                         | 45–78    | 67                         | 46–80  |  |
| ≥ 12 years, restricted to BC, Ontario, Quebec <sup>f,g</sup>                    | 1593  | 10/96                 | 10 | 472/1497              | 32 | 75                         | 51–87    | 75                         | 49–88  |  |
| <b>Influenza A(H3N2)<sup>e,f</sup></b>                                          | 2214  | 27/125                | 22 | 613/2089              | 29 | 34                         | -3 to 57 | 41                         | 4–63   |  |
| ≥ 12 years, restricted to BC, Ontario, Quebec <sup>f,g</sup>                    | 1592  | 20/95                 | 21 | 472/1497              | 32 | 42                         | 4–65     | 44                         | 0–68   |  |
| <b>Excluding COVID-19 cases from influenza test-negative controls</b>           |       |                       |    |                       |    |                            |          |                            |        |  |
| <b>Influenza A<sup>h</sup></b>                                                  | 2694  | 115/722               | 16 | 591/1972              | 30 | 56                         | 45–65    | 60                         | 49–69  |  |
| 1-19 years <sup>h</sup>                                                         | 823   | 24/230                | 10 | 99/593                | 17 | 42                         | 7–64     | 57                         | 29–75  |  |
| 20-64 years <sup>h</sup>                                                        | 1445  | 63/418                | 15 | 264/1027              | 26 | 49                         | 31–62    | 57                         | 41–69  |  |
| ≥ 65 years <sup>f,h</sup>                                                       | 426   | 28/74                 | 38 | 228/352               | 65 | 67                         | 44–80    | 72                         | 50–84  |  |
| ≥ 12 years, restricted to BC, Ontario, Quebec <sup>i</sup>                      | 1807  | 77/449                | 17 | 457/1358              | 34 | 59                         | 47–69    | 61                         | 48–71  |  |
| <b>Influenza A(H1N1)pdm09<sup>h</sup></b>                                       | 2526  | 81/552                | 15 | 591/1972              | 30 | 60                         | 48–69    | 64                         | 53–73  |  |
| 1-19 years <sup>h</sup>                                                         | 776   | 15/183                | 8  | 99/593                | 17 | 55                         | 21–75    | 66                         | 37–81  |  |
| 20-64 years <sup>h</sup>                                                        | 1343  | 46/316                | 15 | 264/1027              | 26 | 51                         | 31–65    | 60                         | 42–72  |  |
| ≥ 65 years <sup>f,h</sup>                                                       | 407   | 20/55                 | 36 | 228/352               | 65 | 69                         | 44–83    | 73                         | 49–86  |  |
| ≥ 12 years, restricted to BC, Ontario, Quebec <sup>i</sup>                      | 1684  | 52/326                | 16 | 457/1358              | 34 | 63                         | 49–73    | 65                         | 51–75  |  |
| 5a.2a.1 <sup>h</sup>                                                            | 2167  | 33/195                | 17 | 591/1972              | 30 | 52                         | 30–68    | 58                         | 36–72  |  |
| ≥ 12 years, restricted to BC, Ontario, Quebec <sup>i</sup>                      | 1466  | 21/108                | 19 | 457/1358              | 34 | 52                         | 22–71    | 55                         | 24–74  |  |
| 5a.2a <sup>h</sup>                                                              | 2159  | 23/187                | 12 | 591/1972              | 30 | 67                         | 49–79    | 68                         | 49–80  |  |
| ≥ 12 years, restricted to BC, Ontario, Quebec <sup>f,i</sup>                    | 1463  | 12/105                | 11 | 457/1358              | 34 | 75                         | 53–86    | 74                         | 51–87  |  |
| <b>Influenza A(H3N2)<sup>f,h</sup></b>                                          | 2114  | 31/142                | 22 | 591/1972              | 30 | 35                         | 2–57     | 38                         | 3–61   |  |
| ≥ 12 years, restricted to BC, Ontario, Quebec <sup>f,i</sup>                    | 1466  | 23/108                | 21 | 457/1358              | 34 | 47                         | 14–67    | 44                         | 5–67   |  |
| <b>Restricted to participants with influenza-like illness (ILI)<sup>j</sup></b> |       |                       |    |                       |    |                            |          |                            |        |  |
| <b>Influenza A<sup>k</sup></b>                                                  | 2483  | 104/636               | 16 | 548/1847              | 30 | 54                         | 42–63    | 58                         | 45–67  |  |
| <b>Influenza A(H1N1)pdm09<sup>k</sup></b>                                       | 2335  | 75/488                | 15 | 548/1847              | 30 | 57                         | 44–67    | 61                         | 47–71  |  |
| <b>Influenza A(H3N2)<sup>f,k</sup></b>                                          | 1974  | 26/127                | 20 | 548/1847              | 30 | 39                         | 5–61     | 46                         | 11–67  |  |

BC: British Columbia; VE: vaccine effectiveness; CI: confidence interval; vac = vaccinated

<sup>a</sup> VE was calculated as  $1 - \text{odds ratios (OR)} \times 100\%$ . ORs compared test positivity between vaccinated and unvaccinated participants by logistic regression with covariate adjustment as specified. Unless otherwise specified, analyses include participants aged  $\geq 1$  years.

<sup>b</sup> All VE analyses adjusted for age group, province and calendar time as specified

<sup>c</sup> Vaccination status based upon participant or guardian report. Participants vaccinated  $< 2$  weeks before acute respiratory illness onset or with unknown vaccine status or timing were excluded.

<sup>d</sup> Unlike the primary analysis, excludes individuals missing sex and comorbidity information and additionally adjusts for sex and comorbidity.

<sup>e</sup> Adjusted for age group (1–8, 9–19, 20–49, 50–64, 65–79,  $\geq 80$  years), province (Alberta, BC, Ontario, Quebec), calendar time (single epi-weeks 44–2), and additionally sex (male, female) and comorbidity (yes, no).

<sup>f</sup> To address sparse data concerns, the use of Firth’s penalized logistic regression or collapsing of epi-weeks into biweekly categories for calendar time adjustment did not alter point estimates by more than 2% (absolute) [not displayed].

<sup>g</sup> Restricted to participants aged  $\geq 12$  years enrolled in BC, Ontario or Quebec for comparison with XBB.1.5 VE. Adjusted for age group



(12-49, 50-64, 65-79,  $\geq 80$  years), province (BC, Ontario, Quebec), calendar time (single epi-weeks 44-2), and additionally sex (male, female) and comorbidity (yes, no).

<sup>h</sup> Adjusted for age group (1-8, 9-19, 20-49, 50-64, 65-79,  $\geq 80$  years), province (Alberta, BC, Ontario, Quebec), and calendar time (single epi-weeks 44-2). Additional adjustment for sex and comorbidity (excluding participants with unknown data) did not alter any point estimates by more than 4% (absolute) [not displayed].

<sup>i</sup> Restricted to participants aged  $\geq 12$  years enrolled in BC, Ontario or Quebec for comparison with XBB.1.5 VE. Adjusted for age group (12-49, 50-64, 65-79,  $\geq 80$  years), province (BC, Ontario, Quebec), and calendar time (single epi-weeks 44-2). Additional adjustment for sex and comorbidity (excluding participants with unknown data) did not alter point estimates by more than 3% (absolute) [not displayed].

<sup>j</sup> Restricted to participants with ILI for comparison with VE estimates from prior seasons. ILI defined as per historic SPSN analyses as fever plus cough plus one or more of sore throat, myalgia, arthralgia, or prostration. Fever is not required for elderly adults  $\geq 65$  years.

<sup>k</sup> Adjusted for age group (1-8, 9-19, 20-49, 50-64, 65-79,  $\geq 80$  years), province (Alberta, BC, Ontario, Quebec), and calendar time (single epi-weeks 44-2). Additional adjustment for sex and comorbidity (excluding participants with unknown data) did not alter point estimates by more than 2% (absolute) [not displayed].

**Supplementary Table S6.** Sensitivity XBB.1.5 vaccine effectiveness estimates against COVID-19 among participants ≥ 12 years in BC, Ontario and Quebec, Canadian Sentinel Practitioner Surveillance Network (SPSN), 29 October (week 44) 2023 – 13 January (week 2) 2024

| With additional sex and comorbidity adjustment <sup>a,b</sup>                                                                                                 | XBB.1.5 vaccinated <sup>c</sup> |    | Not XBB.1.5 vaccinated <sup>c</sup> | Total |
|---------------------------------------------------------------------------------------------------------------------------------------------------------------|---------------------------------|----|-------------------------------------|-------|
|                                                                                                                                                               | n                               | %  | n                                   | N     |
| <b>Total participants</b>                                                                                                                                     | 295                             | 16 | 1576                                | 1871  |
| Weeks since XBB.1.5 dose, median (IQR)                                                                                                                        | 5 (3-8)                         |    | NA                                  | NA    |
| Weeks since last non-XBB.1.5 dose, median (IQR)                                                                                                               | 59 (53-65)                      |    | 99 (70-115)                         | NA    |
| <b>Case participants</b>                                                                                                                                      | 31                              | 10 | 266                                 | 297   |
| Weeks since XBB.1.5 dose, median (IQR)                                                                                                                        | 5 (3-8)                         |    | NA                                  | NA    |
| Weeks since last non-XBB.1.5 dose, median (IQR)                                                                                                               | 61 (54-65)                      |    | 97 (68-109)                         | NA    |
| <b>Control participants</b>                                                                                                                                   | 264                             | 17 | 1310                                | 1574  |
| Weeks since XBB.1.5 dose, median (IQR)                                                                                                                        | 6 (3-8)                         |    | NA                                  | NA    |
| Weeks since last non-XBB.1.5 dose, median (IQR)                                                                                                               | 59 (53-65)                      |    | 99 (70-116)                         | NA    |
| <b>Vaccine effectiveness</b>                                                                                                                                  | %                               |    | 95% CI                              |       |
| Unadjusted <sup>d</sup>                                                                                                                                       | 42                              |    | 14–61                               |       |
| Adjusted <sup>d,e</sup>                                                                                                                                       | 44                              |    | 14–63                               |       |
| Excluding influenza test-positive cases from SARS-CoV-2 test-negative controls <sup>b</sup>                                                                   | XBB.1.5 vaccinated <sup>c</sup> |    | Not XBB.1.5 vaccinated <sup>c</sup> | Total |
|                                                                                                                                                               | n                               | %  | n                                   | N     |
| <b>Total participants</b>                                                                                                                                     | 289                             | 17 | 1371                                | 1660  |
| Weeks since XBB.1.5 dose, median (IQR)                                                                                                                        | 5 (3-8)                         |    | NA                                  | NA    |
| Weeks since last non-XBB.1.5 dose, median (IQR)                                                                                                               | 59 (52-65)                      |    | 98 (67-114)                         | NA    |
| <b>Case participants</b>                                                                                                                                      | 33                              | 10 | 290                                 | 323   |
| Weeks since XBB.1.5 dose, median (IQR)                                                                                                                        | 5 (3-8)                         |    | NA                                  | NA    |
| Weeks since last non-XBB.1.5 dose, median (IQR)                                                                                                               | 61 (54-65)                      |    | 97.5 (68-110)                       | NA    |
| <b>Control participants</b>                                                                                                                                   | 256                             | 19 | 1081                                | 1337  |
| Weeks since XBB.1.5 dose, median (IQR)                                                                                                                        | 5.5 (3-8)                       |    | NA                                  | NA    |
| Weeks since last non-XBB.1.5 dose, median (IQR)                                                                                                               | 58 (52-65)                      |    | 98 (66-114)                         | NA    |
| <b>Vaccine effectiveness</b>                                                                                                                                  | %                               |    | 95% CI                              |       |
| Unadjusted <sup>d</sup>                                                                                                                                       | 52                              |    | 29–67                               |       |
| Adjusted <sup>d,f</sup>                                                                                                                                       | 54                              |    | 31–70                               |       |
| Restricted to participants with previously-confirmed SARS-CoV-2 infection <sup>b,g</sup>                                                                      | XBB.1.5 vaccinated <sup>c</sup> |    | Not XBB.1.5 vaccinated <sup>c</sup> | Total |
|                                                                                                                                                               | n                               | %  | n                                   | n     |
| <b>Total participants</b>                                                                                                                                     | 154                             | 15 | 872                                 | 1026  |
| Weeks since XBB.1.5 dose, median (IQR)                                                                                                                        | 6 (3-8)                         |    | NA                                  | NA    |
| Weeks since last non-XBB.1.5 dose, median (IQR)                                                                                                               | 60 (53-67)                      |    | 99 (69-116)                         | NA    |
| <b>Case participants</b>                                                                                                                                      | 8                               | 6  | 118                                 | 126   |
| Weeks since XBB.1.5 dose, median (IQR)                                                                                                                        | 4 (2.5-7)                       |    | NA                                  | NA    |
| Weeks since last non-XBB.1.5 dose, median (IQR)                                                                                                               | 61 (53-82.5)                    |    | 97 (68-115)                         | NA    |
| <b>Control participants</b>                                                                                                                                   | 146                             | 16 | 754                                 | 900   |
| Weeks since XBB.1.5 dose, median (IQR)                                                                                                                        | 6 (3-8)                         |    | NA                                  | NA    |
| Weeks since last non-XBB.1.5 dose, median (IQR)                                                                                                               | 60 (53-67)                      |    | 99 (70-117)                         | NA    |
| <b>Vaccine effectiveness</b>                                                                                                                                  | %                               |    | 95% CI                              |       |
| Unadjusted <sup>d</sup>                                                                                                                                       | 65                              |    | 27–83                               |       |
| Adjusted <sup>d,f</sup>                                                                                                                                       | 67                              |    | 28–85                               |       |
| Excluding influenza cases from SARS-CoV-2 test-negative controls and restricted to participants with previously-confirmed SARS-CoV-2 infection <sup>b,g</sup> | XBB.1.5 vaccinated <sup>c</sup> |    | Not XBB.1.5 vaccinated <sup>c</sup> | Total |
|                                                                                                                                                               | n                               | %  | n                                   | n     |
| <b>Total participants</b>                                                                                                                                     | 127                             | 16 | 654                                 | 781   |
| Weeks since XBB.1.5 dose, median (IQR)                                                                                                                        | 6 (3-8)                         |    | NA                                  | NA    |
| Weeks since last non-XBB.1.5 dose, median (IQR)                                                                                                               | 61 (53-66)                      |    | 97 (66.5-115)                       | NA    |
| <b>Case participants</b>                                                                                                                                      | 8                               | 6  | 118                                 | 126   |
| Weeks since XBB.1.5 dose, median (IQR)                                                                                                                        | 4 (2.5-7)                       |    | NA                                  | NA    |
| Weeks since last non-XBB.1.5 dose, median (IQR)                                                                                                               | 61 (53-82.5)                    |    | 97 (68-115)                         | NA    |
| <b>Control participants</b>                                                                                                                                   | 119                             | 18 | 536                                 | 655   |
| Weeks since XBB.1.5 dose, median (IQR)                                                                                                                        | 6 (3-8)                         |    | NA                                  | NA    |
| Weeks since last non-XBB.1.5 dose, median (IQR)                                                                                                               | 61 (53-66)                      |    | 97 (64-115)                         | NA    |
| <b>Vaccine effectiveness</b>                                                                                                                                  | %                               |    | 95% CI                              |       |
| Unadjusted <sup>d</sup>                                                                                                                                       | 69                              |    | 36–85                               |       |
| Adjusted <sup>d,f</sup>                                                                                                                                       | 72                              |    | 39–87                               |       |

BC: British Columbia; CI: confidence interval; IQR: interquartile range; NA: not applicable.

<sup>a</sup> Unlike primary analyses, excludes individuals with missing sex and comorbidity information.

<sup>b</sup> All COVID-19 analyses exclude participants <12 years and those who received a non-XBB.1.5 COVID-19 vaccine ≤24 before provincial launch of the publicly funded XBB.1.5 vaccine campaign (i.e., receipt of non-XBB.1.5 vaccine on or after 26 April 2023 in BC, 15 May 2023 in Ontario, and 25 April 2023 in Quebec).

<sup>c</sup> Vaccination status based upon provincial immunization registry data from BC, Ontario, and Quebec. Participants vaccinated < 2 weeks before acute respiratory illness onset or with unknown vaccination status or timing were excluded.

<sup>d</sup> VE was calculated as  $1 - \text{odds ratios (OR)} \times 100\%$ . ORs compared test positivity between vaccinated and unvaccinated participants by logistic regression with covariate adjustment as specified.

<sup>e</sup> Adjusted for age group (12-49, 50-64, 65-79, ≥ 80 years), province (BC, Ontario, Quebec), calendar time (single epi-weeks 44-2) and, additionally, sex (male, female) and comorbidity (yes, no).

<sup>f</sup> Adjusted as per primary analysis for age group (12-49, 50-64, 65-79, ≥ 80 years), province (BC, Ontario, Quebec), and calendar time (single epi-weeks 44-2). Additional adjustment for sex and comorbidity (excluding participants with unknown data) did not alter point estimates by more than 2% (absolute) [not displayed].

<sup>g</sup> Restricted to participants with one or more previously confirmed SARS-CoV-2 infections (confirmed by nucleic acid amplification test (NAAT) or rapid antigen test (RAT)), as reported by participant or guardian. NAAT testing for SARS-CoV-2 was broadly available in Canada until early 2022 when self-administered RATs became widely accessible through private purchase and/or publicly funded access.

**Supplementary Table S7.** Age-stratified XBB.1.5 vaccine effectiveness estimates against COVID-19 among participants 12–64 years and ≥ 65 years in BC, Ontario and Quebec, Canadian Sentinel Practitioner Surveillance Network (SPSN), 29 October (week 44) 2023 – 13 January (week 2) 2024

| Without sex and comorbidity adjustment <sup>a</sup> | 12 to 64 years                  |    |                                     | ≥ 65 years |                                 |    |                                     |       |
|-----------------------------------------------------|---------------------------------|----|-------------------------------------|------------|---------------------------------|----|-------------------------------------|-------|
|                                                     | XBB.1.5 Vaccinated <sup>b</sup> |    | Not XBB.1.5 Vaccinated <sup>b</sup> | Total      | XBB.1.5 Vaccinated <sup>b</sup> |    | Not XBB.1.5 Vaccinated <sup>b</sup> | Total |
|                                                     | n                               | %  | n                                   | N          | n                               | %  | n                                   | N     |
| <b>Total participants</b>                           | 176                             | 10 | 1,506                               | 1,682      | 166                             | 39 | 264                                 | 430   |
| Weeks since XBB.1.5 dose, median (IQR)              | 5 (3–8)                         |    | NA                                  | NA         | 5 (3–7)                         |    | NA                                  | NA    |
| Weeks since last non-XBB.1.5 dose, median (IQR)     | 60 (54–65)                      |    | 99 (83–117)                         | NA         | 57 (51–65)                      |    | 75.5 (56–101)                       | NA    |
| <b>Case participants</b>                            | 15                              | 6  | 239                                 | 254        | 18                              | 26 | 51                                  | 69    |
| Weeks since XBB.1.5 dose, median (IQR)              | 5 (3–9)                         |    | NA                                  | NA         | 4.5 (3–7)                       |    | NA                                  | NA    |
| Weeks since last non-XBB.1.5 dose, median (IQR)     | 60 (55–68)                      |    | 98.5 (75–115)                       | NA         | 61 (52–62)                      |    | 81.5 (59–100)                       | NA    |
| <b>Control participants</b>                         | 161                             | 11 | 1,267                               | 1,428      | 148                             | 41 | 213                                 | 361   |
| Weeks since XBB.1.5 dose, median (IQR)              | 5 (4–8)                         |    | NA                                  | NA         | 5.5 (3–8)                       |    | NA                                  | NA    |
| Weeks since last non-XBB.1.5 dose, median (IQR)     | 60 (54–65)                      |    | 100 (84–118)                        | NA         | 57 (49–65)                      |    | 73.5 (56–101)                       | NA    |
| <b>Vaccine effectiveness</b>                        | %                               |    | 95% CI                              |            | %                               |    | 95% CI                              |       |
| Unadjusted <sup>c</sup>                             | 51                              |    | 15–71                               |            | 49                              |    | 10–71                               |       |
| Adjusted <sup>c,d</sup>                             | 47                              |    | 7–70                                |            | 52                              |    | 10–74                               |       |
| With sex and comorbidity adjustment <sup>a,e</sup>  | XBB.1.5 Vaccinated <sup>b</sup> |    | Not XBB.1.5 Vaccinated <sup>b</sup> | Total      | XBB.1.5 Vaccinated <sup>b</sup> |    | Not XBB.1.5 Vaccinated <sup>b</sup> | Total |
|                                                     | n                               | %  | n                                   | N          | n                               | %  | n                                   | N     |
|                                                     | XBB.1.5 Vaccinated <sup>b</sup> |    | Not XBB.1.5 Vaccinated <sup>b</sup> | Total      | XBB.1.5 Vaccinated <sup>b</sup> |    | Not XBB.1.5 Vaccinated <sup>b</sup> | Total |
| <b>Total participants</b>                           | 150                             | 10 | 1,335                               | 1,485      | 145                             | 38 | 241                                 | 386   |
| Weeks since XBB.1.5 dose, median (IQR)              | 6 (3–8)                         |    | NA                                  | NA         | 5 (3–7)                         |    | NA                                  | NA    |
| Weeks since last non-XBB.1.5 dose, median (IQR)     | 60 (54–64)                      |    | 99 (83–118)                         | NA         | 57 (49–65)                      |    | 76 (57–101)                         | NA    |
| <b>Case participants</b>                            | 14                              | 6  | 220                                 | 234        | 17                              | 27 | 46                                  | 63    |
| Weeks since XBB.1.5 dose, median (IQR)              | 6 (3–9)                         |    | NA                                  | NA         | 4 (3–7)                         |    | NA                                  | NA    |
| Weeks since last non-XBB.1.5 dose, median (IQR)     | 60.5 (55–68)                    |    | 98 (74–115)                         | NA         | 61 (52–62)                      |    | 80 (60–99)                          | NA    |
| <b>Control participants</b>                         | 136                             | 11 | 1,115                               | 1,251      | 128                             | 40 | 195                                 | 323   |
| Weeks since XBB.1.5 dose, median (IQR)              | 6 (3–8)                         |    | NA                                  | NA         | 5 (3–8)                         |    | NA                                  | NA    |
| Weeks since last non-XBB.1.5 dose, median (IQR)     | 60 (54–64)                      |    | 99 (84–118)                         | NA         | 57 (48.5–65.5)                  |    | 75 (56–101)                         | NA    |
| <b>Vaccine effectiveness</b>                        | %                               |    | 95% CI                              |            | %                               |    | 95% CI                              |       |
| Unadjusted <sup>c</sup>                             | 48                              |    | 8–70                                |            | 44                              |    | -3 to 69                            |       |
| Adjusted <sup>c,f</sup>                             | 46                              |    | 2–70                                |            | 46                              |    | -3 to 72                            |       |

BC: British Columbia; CI: confidence interval; IQR: interquartile range; NA: not applicable.

<sup>a</sup> All COVID-19 analyses exclude participants <12 years and those who received a non-XBB.1.5 COVID-19 vaccine ≤24 before provincial launch of the publicly funded XBB.1.5 vaccine campaign (i.e., receipt of non-XBB.1.5 vaccine on or after 26 April 2023 in BC, 15 May 2023 in Ontario, and 25 April 2023 in Quebec).

<sup>b</sup> Vaccination status based upon provincial immunization registry data from BC, Ontario, and Quebec. Participants vaccinated < 2 weeks before acute respiratory illness onset or with unknown vaccination status or timing were excluded.

<sup>c</sup> VE was calculated as 1 – odds ratios (OR) × 100%. ORs compared test positivity between vaccinated and unvaccinated participants by logistic regression with covariate adjustment as specified.

<sup>d</sup> Adjusted for age group (12–49, 50–64, 65–79, ≥ 80 years), province (BC, Ontario, Quebec), calendar time (single epi-weeks 44–2).

<sup>e</sup> Unlike primary analyses, excludes individuals with missing sex and comorbidity information.

<sup>f</sup> Adjusted for age group (12–49, 50–64, 65–79, ≥ 80 years), province (BC, Ontario, Quebec), calendar time (single epi-weeks 44–2) and, additionally, sex (male, female) and comorbidity (yes, no).

## References, Supplementary Material

1. Shu Y, McCauley J. GISAID: Global initiative on sharing all influenza data - from vision to reality. *Euro Surveill.* 2017;22(13):30494. <https://doi.org/10.2807/1560-7917.ES.2017.22.13.30494> PMID: 28382917
2. European Centre for Disease Prevention and Control (ECDC). Influenza virus characterization, Summary report, Europe, December 2023. Stockholm: ECDC [Accessed: 17 January 2024]. Available from: <https://www.ecdc.europa.eu/en/publications-data/influenza-virus-characterization-summary-europe-december-2023>
3. Aksamentov I, Roemer C, Hodcroft EB, Neher RA. Nextclade: clade assignment, mutation calling and quality control for viral genomes. *Journal of Open Source Software.* 2021;6(677). doi: <https://doi.org/10.21105/joss.03773>.
4. Freed N, Murphy L, Schwessinger B, Silander O. "Midnight" SARS-CoV2 genome sequencing protocol using 1200bp amplicon primer set v2 and the Nanopore Rapid library kit. *Protocols.io.* 2023. doi: <https://dx.doi.org/10.17504/protocols.io.14egn2q2yg5d/v1>.
5. Hickman R, Nguyen J, Lee TD, Tyson JR, Azana R, Tsang F, et al. Rapid, High-Throughput, Cost Effective Whole Genome Sequencing of SARS-CoV-2 Using a Condensed One Hour Library Preparation of the Illumina DNA Prep Kit. *medRxiv.* 2022:2022.02.07.22269672. doi: 10.1101/2022.02.07.22269672.
6. ARTIC Network. 2023. SARS-CoV-2 version 5.3.2 Scheme Release. Online Resource. [Accessed: 31 January 2024]. Available online at: <https://community.artic.network/t/sars-cov-2-version-5-3-2-scheme-release/462>.
7. Quick, J. 2020. nCOV-2019 Sequencing Protocol. Online Resource. [Accessed: 31 January 2024]. Available online at: <https://www.protocols.io/view/ncov-2019-sequencing-protocol-bbmuik6w.pdf>.
8. Illumina COVIDSeq Test Instructions for Use. California: Illumina; 2021. [Accessed: 31 January 2024]. Available from: [https://support.illumina.com/content/dam/illumina-support/documents/documentation/chemistry\\_documentation/Illumina-COVIDSeq-Test/illumina-covidseq-test-instructions-for-use-canada-200004493-00.pdf](https://support.illumina.com/content/dam/illumina-support/documents/documentation/chemistry_documentation/Illumina-COVIDSeq-Test/illumina-covidseq-test-instructions-for-use-canada-200004493-00.pdf)
9. Bourgey M, Dali R, Eveleigh et al. GenPipes: an open-source framework for distributed and scalable genomic analyses. *GigaScience* 2019;8(6):giz037. [Accessed: 31 January 2024]. Available from: <https://academic.oup.com/gigascience/article/8/6/giz037/5513895>
10. Public Health Ontario (PHO). SARS-CoV-2 Genomic Surveillance in Ontario, January 22, 2024 Toronto: PHO; 2024 [26 January 2024]. Available from: [https://www.publichealthontario.ca/-/media/Documents/nCoV/epi/covid-19-sars-cov2-whole-genome-sequencing-epi-summary.pdf?rev=41fb65ae9aa04fa78c67fd69ffb7c9f7&sc\\_lang=en](https://www.publichealthontario.ca/-/media/Documents/nCoV/epi/covid-19-sars-cov2-whole-genome-sequencing-epi-summary.pdf?rev=41fb65ae9aa04fa78c67fd69ffb7c9f7&sc_lang=en).
11. Institut national de santé publique du Québec (INSPQ). Données sur les variants du SRAS-CoV-2 au Québec Wolfe: INSPQ; 2024 [Accessed: 26 January 2024]. Available from: <https://www.inspq.qc.ca/en/node/26253>.
12. British Columbia Centre for Disease Control (BCCDC). Respiratory Genomic Surveillance Vancouver: BCCDC; 2024 [Accessed: 26 January 2024]. Available from: [https://bccdc.shinyapps.io/genomic\\_surveillance/](https://bccdc.shinyapps.io/genomic_surveillance/).
13. Rambaut A, Holmes EC, O'Toole Á, Hill V, McCrone JT, Ruis C, et al. A dynamic nomenclature proposal for SARS-CoV-2 lineages to assist genomic epidemiology *Nat Microbiol* 2020;5:1403-07 DOI:10.1038/s41564-020-0770-5
14. O'Toole Á, Scher E, Underwood A, Jackson B, Hill V, McCrone JT, et al. Assignment of epidemiological lineages in an emerging pandemic using the pangolin tool. *Virus Evolution.* 2021;7(2):veab064. doi: 10.1093/ve/veab064.
15. De Serres G, Skowronski DM, Wu XW, Ambrose CS. The test-negative design: validity, accuracy and precision of vaccine efficacy estimates compared to the gold standard of randomised placebo-controlled clinical trials *Euro Surveill.* 2013; 18(37): pii=20585. <https://doi.org/10.2807/1560-7917.ES2013.18.37.20585>
16. Doll MK, Pettigrew SM, Ma J, Verma A. Effects of confounding bias in coronavirus disease 2019 (COVID-19) and influenza vaccine effectiveness test-negative designs due to correlated influenza and COVID-19 vaccination behaviors. *Clin Infect Dis* 2022;75(1):e564-e71. doi: 10.1093/cid/ciac234.
